1 **Subcellular localization of microcystin in the liver and the gonad of medaka fish**  
2 **acutely exposed to microcystin-LR**

3 *Qin Qiao*<sup>1</sup>, *Chakib Djediat*<sup>1</sup>, *Hélène Huet*<sup>1,2</sup>, *Charlotte Duval*<sup>1</sup>, *Séverine Le Manach*<sup>1</sup>,  
4 *Cécile Bernard*<sup>1</sup>, *Marc Edery*<sup>1</sup>, *Benjamin Marie*<sup>1,\*</sup>

5 <sup>1</sup> UMR 7245 MNHN/CNRS Molécules de Communication et Adaptation des  
6 Micro-organismes, Sorbonne Universités, Muséum National d'Histoire Naturelle, CP  
7 39, 12 Rue Buffon, 75005 Paris, France.

8 <sup>2</sup> Ecole Nationale Vétérinaire d'Alfort, Université Paris-Est, BioPôle Alfort, 94700  
9 Maisons-Alfort, France.

10

11 \* Corresponding author. UMR 7245 MNHN/CNRS Molécules de Communication et  
12 Adaptation des Micro-organismes, Sorbonne Universités, Muséum National  
13 d'Histoire Naturelle, CP 39, 12 Rue Buffon, 75005 Paris, France. Tel.: +33 1 40 79 32  
14 12

15 E-mail address: bmarie@mnhn.fr (B. Marie)

16

17 **Abstract**

18 Among the diverse toxic components produced by cyanobacteria, microcystins  
19 (MCs) are one of the most toxic and notorious cyanotoxin groups. Besides their potent  
20 hepatotoxicity, MCs have been revealed to induce potential reproductive toxicity in  
21 various animal studies. However, little is still known regarding the distribution of  
22 MCs in the reproductive organ, which could directly affect reproductive cells. In order  
23 to respond to this question, an acute study was conducted in adult medaka fish (model  
24 animal) gavaged with 10  $\mu\text{g}\cdot\text{g}^{-1}$  body weight of pure MC-LR. The histological and  
25 immunohistochemical examinations reveal an intense distribution of MC-LR within  
26 hepatocytes along with a severe liver lesion in the toxin-treated female and male fish.  
27 Besides being accumulated in the hepatocytes, MC-LR was also found in the  
28 connective tissue of the ovary and the testis, as well as in oocytes and degenerative  
29 spermatocyte-like structures. Both liver and gonad play important roles in the  
30 reproductive process of oviparous vertebrates. This observation constitutes the first

31 observation of the presence of MC-LR in the reproductive cell of a vertebrate model  
32 with *in vivo* study. Our results, which provide intracellular localization of MC-LR in  
33 the gonad, advance our understanding of the potential reproductive toxicity of MC-LR  
34 in fish.

35 **Keywords:**

36 Microcystin; reproductive cell; immunogold electron microscopy; OATP;  
37 reproductive toxicity

38

39 **1. Introduction**

40 Recurrent cyanobacterial blooms frequently occur worldwide in eutrophic  
41 freshwaters. Various bloom-generating species of cyanobacteria can produce natural  
42 toxic components (cyanotoxins), and their blooms threaten human health as well as  
43 living organisms of the aquatic environment. Among cyanotoxins, microcystins (MCs)  
44 are the most prevalent cyanobacterial hepatotoxins, with 248 structural variants  
45 (Spoof and Catherine, 2017), being produced by at least six genera of cyanobacteria  
46 (Puddick et al., 2014). Among all these known variants, microcystin-LR (MC-LR) is  
47 considered to be the most common and potently toxic (Puddick et al., 2014).

48 MCs have difficulty to penetrate into vertebrate cells via passive transport due to  
49 their hydrophilic nature, and organic anion transporting polypeptides (OATPs) are  
50 known to be able to transport MCs through cell membranes (Campos and Vasconcelos,  
51 2010). Once within the cell, MCs specifically inhibit eukaryotic serine/threonine  
52 protein phosphatases 1 and 2A, which causes the disruption of numerous cellular  
53 signals and processes (Fischer et al., 2005; MacKintosh et al., 1990). Although there  
54 have been 70 members of OATP superfamily identified in the database from humans,  
55 rodents and some additional species (Hagenbuch and Stieger, 2013), not all OATPs  
56 are capable to transport MCs through cell membranes. The capability of MC-transport  
57 has been demonstrated for OATP1A2 (mainly expressed in the vertebrate brain),  
58 liver-specific OATP1BA and OATP1B3 in humans (Fischer et al., 2005). In fish,  
59 liver-specific OATPs, such as OATP1d1 in little skate (Meier-Abt et al., 2007) and  
60 rtOATP1d1 in rainbow trout (Steiner et al., 2014), have been reported to mediate

61 MC-transport. Different types of OATP distributed in different tissue or organs  
62 possess varying levels of affinities and capacities for different MC variants (Fischer et  
63 al., 2010, 2005; Steiner et al., 2016). Liver is the organ that presents the highest  
64 tropism for MCs (so-called “target”), since it is rich in a few liver-specific OATP  
65 members possessing high affinities and capacities to MCs. Several studies have  
66 reported the acute hepatotoxicity of MCs characterized by hepatocellular apoptosis  
67 (Zhang et al., 2013), necrosis (Mattos et al., 2014), intrahepatic hemorrhaging (Hou et  
68 al., 2015), and cytoskeleton disruption (Zhou et al., 2015). Additionally, the  
69 distribution of MCs in the liver has been detected using immunohistochemical  
70 methods in mice (Guzman and Solter, 2002; Yoshida et al., 1998) and fish (Djediat et  
71 al., 2011; Fischer and Dietrich, 2000; Marie et al., 2012).

72 In addition to liver, MCs have been documented to distribute and accumulate in  
73 various fish organs including intestine, kidney, gill and gonad (Acuña et al., 2012;  
74 Djediat et al., 2010; Mezhoud et al., 2008; Trinchet et al., 2013, 2011). Among these  
75 organs, the gonad could be considered as a secondarily most important target of MCs,  
76 as several field studies reported also the presence of MCs in the gonad of fish. For  
77 instance, in Lake Pamvotis (Greece), the gonad of common carp (*Cyprinus caprio*)  
78 was reported to contain about 50 ng eq. MC-LR g<sup>-1</sup> body weight (bw) using ELISA  
79 test (Papadimitriou et al., 2012), and in Lake Taihu (China), three variants of MC  
80 (MC-LR, -YR and -LR) were determined in the gonad of various fish species using a  
81 liquid chromatography-electrospray ionization-mass spectrum system (LC-ESI-MS).  
82 Particularly, silver carp (*Hypophthalmichthys molitrix*) and goldfish (*Carassius*  
83 *auratus*) were observed to contain high concentrations of MCs in the gonad (60 and  
84 150 ng MCs g<sup>-1</sup> DW, respectively) (Chen et al., 2009). In laboratories, the distribution  
85 of MC-LR in the gonad of medaka fish administered with pure toxin was also testified  
86 using a radiotracing method (Mezhoud et al., 2008). Although the accumulation of  
87 MCs in the gonad has been documented previously through different methods, little is  
88 known about the localization of MCs within the gonad tissue, or about the  
89 intracellular distribution of MCs. Only one field study reported the presence of MCs  
90 in the gonadal somatic tissue, but apparently not in the oocytes in common bream

91 (*Abramis brama*) using immunohistochemical method (Trinchet et al., 2013). To date,  
92 it is still hard to know whether MC could enter the reproductive cells or only  
93 accumulate in the conjunctive tissue of gonad. Although not the most sensitive  
94 detection method, the immunohistochemical examination is a well-established way of  
95 providing the precise subcellular localization of MCs in the gonad, which could  
96 largely advance our current knowledge of the directly toxic effects of MCs on the  
97 gonad.

98 In the present study, in order to investigate subcellular distribution of MCs in fish  
99 gonads, an immunohistochemical assay with light microscopy and electron  
100 microscopy was conducted in adult medaka fish that were gavaged with acute doses  
101 of MC-LR (10  $\mu\text{g}\cdot\text{g}^{-1}$  bw of MC-LR, 1 h exposure). Localization of the toxin in the  
102 gonad was showed by MC-LR-specific antibodies, MC10E7, that specifically binds to  
103 the arginine at position 4 of MC-LR (Zeck et al., 2001). In addition, the toxin  
104 distribution and histopathological change in the liver (the first target of MCs) were  
105 also investigated in order to compare the toxic effect in liver and gonad.

106

## 107 **2. Materials and methods**

### 108 **2.1 Chemical and reagent**

109 MC-LR, purchased from Novakit® (Nantes, France), was selected as the model  
110 MC for the present experiment. Five hundred  $\mu\text{g}$  of MC-LR was dissolved in 500  $\mu\text{L}$   
111 of ethanol and 500  $\mu\text{L}$  of water. The ethanol was evaporated with a Speedvac. The  
112 concentration of MC-LR in the obtained solution was quantified using a commercial  
113 Adda-specific AD4G2 ELISA test (Abraxis), and then adjusted to be 1  $\mu\text{g}\cdot\mu\text{L}^{-1}$ .

### 114 **2.2 Fish maintenance, exposure and sampling**

115 The experimental procedures were conducted in accordance with the European  
116 Union regulations and the supervision of the Cuvier's ethical committee of the  
117 Museum National d'Histoire Naturelle (MNHN) concerning the protection of  
118 experimental animals. Five-month-old medaka fish (*Oryzias latipes*) of the inbred  
119 Cab strain maintained in the lab was used for this experiment. Female and male fish  
120 were maintained in 2 glass aquaria, respectively, filled with a mixture of tap water and

121 reverse osmosis filtered water (1:2) in a flow-through system for aeration and  
122 filtration, in a temperature controlled room ( $25 \pm 1$  °C), with a 12 h:12 h light:dark  
123 cycle. Fish were fed three times a day with commercial dry bait for juvenile salmon.

124 Eight females and eight males were randomly selected from the aquaria. The fish  
125 were anesthetized with tricaine ( $150 \text{ mg.L}^{-1}$ ) before gavage. Five females and five  
126 males were gavaged with  $5 \mu\text{L}$  of MC-LR solution ( $1 \mu\text{g}.\mu\text{L}^{-1}$ ) per fish, representing  
127 about  $10 \mu\text{g.g}^{-1}$  bw of MC-LR (average body weight is 0.52 g, the body weight of  
128 individual fish is shown in Supplementary table 1). This concentration is modified  
129 according to a few previous studies in which medaka fish exhibited noticeable tissue  
130 damage and toxin presence in liver upon exposure to  $5 \mu\text{g.g}^{-1}$  bw of MC-LR (Djediat  
131 et al., 2011, 2010). Two females and two males were gavaged with  $5 \mu\text{L}$  water as the  
132 non-toxin control, and 1 female and 1 male without any treatment were used as the  
133 non-gavage control. After 1 h oral exposure, fish were anesthetized with tricaine,  
134 sacrificed, and the liver and gonad were collected on ice. One tissue was cut into 2  
135 parts, one part was immediately fixed with formaldehyde fixing solution  
136 (Supplemental material 1) according to the protocol provided by the histopathological  
137 platform of Ecole Nationale Vétérinaire d'Alfort (ENVA), and the other part was fixed  
138 with paraformaldehyde fixing solution (Supplemental material 2) following the  
139 instruction of the electron microscopy platform of Muséum National d'Histoire  
140 Naturelle (MNHN).

### 141 **2.3 Histopathological observation and immunolocalization of microcystins**

142 In the platform of ENVA, the liver and gonad samples fixed in formaldehyde  
143 fixing solution at 4 °C for 48 h were dehydrated in successive baths of ethanol (from  
144 70 to 100%) and embedded in paraffin. Blocks were cut into  $4 \mu\text{m}$  thick sections. The  
145 sections of each sample were deposited on 3 slides. One slide was stained with  
146 hematoxylin-eosin-saffron (HES) staining for histopathological observation. Another  
147 slide (only liver sample) was stained with periodic acid-Schiff (PAS)/Alcian blue  
148 staining for the assessment of hepatic glycogen reserve. The glycogen reserve analysis  
149 performed by ImageJ software (version 1.51d) estimated the hepatic glycogen  
150 quantity as a surface percentage of the purple-red pixels on 5 randomly selected

151 photos (200 × magnification, photo size 1388×1040 pixels, as seen in Figure 1) per  
152 individual. The last slide, for immunolocalization of MC, was incubated with a  
153 monoclonal antibody to MC-LR (MC10E7, Alexis) that recognizes all MCs with Arg  
154 in position 4 (dilution 1:4000). The immunolabeling was routinely performed with an  
155 automated Module Discovery XT (Ventana, Tuscon, USA) using a colorimetric  
156 peroxidase-specific staining with diaminobenzidine (DAB), a substrate that produces  
157 a highly insoluble brown precipitate. The slides were counterstained with hematoxylin  
158 in the end. The secondary antibody control sections were prepared by skipping the  
159 first antibody MC10E7 incubation step. One MC-contaminated medaka liver sample  
160 from an acute high dose exposure in the lab previously was included as the technically  
161 positive control.

162 In the platform of MNHN, the liver and gonad samples fixed in  
163 paraformaldehyde fixing solution at 4 °C overnight were dehydrated in successive  
164 baths of ethanol (from 30 to 100%) and embedded into the Unicryl resin. Blocks were  
165 cut into 0.5 µm-thick semi-thin sections (stained with toluidine blue staining) and 60  
166 nm-thick ultrathin sections for histopathological observation and immunolocalization  
167 of MC with electron microscopy, respectively. The 60 nm-thick ultrathin sections  
168 were collected by gold grids. Then, the sections were incubated with the same  
169 primary antibodies (MC10E7) at 4 °C overnight and rinsed, then incubated with a  
170 secondary antibody coupled to gold nanoballs (6 or 10 nm of diameter) at room  
171 temperature for 1 h. After being well rinsed with distilled water, the sections were  
172 stained with a saturated solution of uranyl acetate in 50% ethanol and then observed  
173 under an H-7700 Hitachi (Tokyo, Japan) transmission electron microscope.

174

### 175 **3. Results**

176 During the 1 hour of post-gavage, all MC-treated fish exhibit abnormal  
177 swimming behaviors, such as difficulty in moving or losing body balance. In the  
178 contrary, the fish of control group all swim normally. Histopathological and  
179 immunohistochemical observation results of each individual are summarized in Table  
180 1, which shows visible toxic effects and clear toxin distribution in nearly every

181 MC-treated fish, but not in any control fish.

182

183 Table 1 Histopathological and immunohistochemical observation of each individual

184 liver and gonad

| Group                                            | Fish <sup>a</sup> | Post-gavage | Histopathology (Liver)    |                                   | Anti-MC-LR labeling <sup>d</sup> |       |                     |   |
|--------------------------------------------------|-------------------|-------------|---------------------------|-----------------------------------|----------------------------------|-------|---------------------|---|
|                                                  |                   |             | Light microscopy          |                                   | Light microscopy                 |       | Electron microscopy |   |
|                                                  |                   |             | Liver damage <sup>b</sup> | Glycogen reserve (%) <sup>c</sup> | Liver                            | Gonad | Gonad               |   |
| 10 $\mu\text{g}\cdot\text{g}^{-1}$ b.w. of MC-LR | F01               | 1 h         | +                         | 23%                               | ++                               | +     | ++                  |   |
|                                                  | F03               | 1 h         | ++                        | 22%                               | ++                               | +     | +                   |   |
|                                                  | F04               | 1 h         | +                         | 15%                               | ++                               | +     | ++                  |   |
|                                                  | F07               | 1 h         | ++                        | 12%                               | ++                               | +     | ++                  |   |
|                                                  | F10               | 1 h         | +                         | 1%                                | ++                               | +     | n.o.                |   |
|                                                  | M02               | 1 h         | +                         | 0%                                | ++                               | 0     | ++                  |   |
|                                                  | M05               | 1 h         | ++                        | 20%                               | ++                               | +     | ++                  |   |
|                                                  | M06               | 1 h         | +                         | 2%                                | ++                               | +     | n.o.                |   |
|                                                  | M08               | 1 h         | +                         | 26%                               | ++                               | 0     | +                   |   |
| Control                                          | Non-toxin         | F12         | 1 h                       | 0                                 | 22%                              | 0     | 0                   | 0 |
|                                                  |                   | F14         | 1 h                       | 0                                 | 50%                              | 0     | 0                   | 0 |
|                                                  |                   | M13         | 1 h                       | 0                                 | 16%                              | 0     | 0                   | 0 |
|                                                  | Non-gavage        | M11         | 1 h                       | 0                                 | 25%                              | 0     | 0                   | 0 |
|                                                  |                   | F16         | 1 h                       | 0                                 | 49%                              | 0     | 0                   | 0 |
|                                                  |                   | M15         | 1 h                       | 0                                 | 47.2                             | 0     | 0                   | 0 |

185 <sup>a</sup> F and M indicate female and male fish, respectively. <sup>b</sup> “++” indicates a severe liver damage, characterized by a large proportion of round hepatocytes, significant mitosis arrest, and obvious cell lysis and disjunction. “+” indicates a moderate liver damage, characterized by a large proportion of round hepatocytes, and a small area of cell lysis and disjunction. “0” indicates the normal liver structure. <sup>c</sup> indicates the percentage of glycogen reserve in the liver, the calculation formula: the area of the purple-red pixels  $\div$  the area of the whole image (1388 $\times$ 1040 pixels)  $\times$  100%. <sup>d</sup> “++” indicates strong and widely distributed immunolabelings, “+” indicates only a few immunolabeling spots, “0” indicates no immunolabeling, and “n.o.” indicates not observed.

### 193 3.1 Histopathological effects with light microscopy

194 In the liver of all control fish, hepatocytes present compact and characteristic  
195 cord-like parenchymal organization and a distinctive central nucleus with a prominent  
196 nucleolus (Figure 1 A and B). The cytoplasm of hepatocytes contains mainly

197 glycoprotein and/or glycogen stores that are intensively stained in red-purple with  
198 PAS staining (Figure 1 E and F). In contrast, the livers of MC-LR treated fish exhibit  
199 noticeable tissue lesions characterized by a disintegration of the parenchymal  
200 organization and significant cell lysis. The hepatocytes all lose their polyhedral shape  
201 and become rounded and swollen. Within the hepatocytes, the reserve vesicles  
202 disappear, the cytoplasm presents various small bubble-like structures, and the nuclear  
203 chromatin becomes dense. Some hepatocytes exhibit a breakdown of the nuclear  
204 membrane, mitosis arrest, and dilation of endoplasmic reticulum (Figure 1 C and D).  
205 In addition, the hepatic intracellular glycoprotein and/or glycogen quantity seems to  
206 decrease, and the mean values of glycogen percentage for female controls, male  
207 controls, female toxin-treated fish and male toxin-treated fish are 15%, 11%, 40% and  
208 29%.

209 For the gonad, there is no apparent cellular difference between the toxin-treated  
210 fish and the control ones.

### 211 **3.2 Immunolocalization of MC-LR in the liver and the gonad**

212 Through light microscopy, all livers of MC-LR treated fish exhibit a strong  
213 positive signal of MC-LR specific antibodies (Figure 2 A) whereas the secondary  
214 antibody control does not display any positive signal (Figure 2 B), being similar to  
215 control fish in which no immunolabeling is observed (Figure 2 G). For the toxin  
216 treated fish, the brown immunolabelings are evenly distributed in hepatocytes, but not  
217 in erythrocytes which are only stained in blue by hematoxylin. Within hepatocytes,  
218 the immunolabeling of MCs is showed in the cytoplasm and more intense labeling is  
219 observed in nuclei (Figure 2 A). Immunogold electron microscopy also shows that the  
220 black nanoballs (immunolabelings) are localized in the cytoplasmic inclusion and the  
221 nucleus (Figure 3 C) of hepatocytes of MC-LR treated fish, being particularly intense  
222 in the lysis area (Figure 3 B). MC-LR is also distributed intensely in residual bodies  
223 of the macrophage (Figure 3 D), whereas no immunolabeling is observed in the  
224 control fish (Figure 3 A) or in the secondary antibody control sections.

225 By light microscopy observation of the ovary of toxin-treated fish, clear  
226 immunolabelings are detected in the connective tissue and some round cells with



227 above 10  $\mu\text{m}$  in diameter, being probably the early stage of oocyte (Figure 2 C),  
228 whereas the secondary antibody control does not display any positive signal (Figure 2  
229 D), being similar to the control fish in which no immunolabeling is observed (Figure  
230 2 H). Moreover, electron microscopy shows that the immunogold labelings are not  
231 only present in the gonadal somatic cells, but also distributed intensively in the  
232 chorion of oocytes (Figure 3 F), being less intense in the yolk vesicles and cytoplasm  
233 of oocytes (Figure 3 H), whereas no immunolabeling is observed in either the control  
234 fish (Figure 3 E and G) or the secondary antibody control sections.

235 On light microscope, weaker immunolabelings are found in the testicular  
236 connective tissue of a few toxin-treated male fish (Figure 2 E), whereas the secondary  
237 antibody control does not display any positive signal (Figure 2 F), being similar to the  
238 control fish in which no immunolabeling is observed (Figure 2 I). Immunogold  
239 electron microscopy shows a remarkable labeling in some round unidentified  
240 structures, being probably some degenerated germ cells (Figure 3 J), as well as in the  
241 connective tissue of certain area nearby seminiferous tubules (Figure 3 K), whereas  
242 no immunolabeling is observed in either the control fish (Figure 3 I) or the secondary  
243 antibody control section.

#### 244 **4. Discussion**

245 MC-treated female and male fish in this study show the characteristic  
246 hepatocellular changes and the depletion of glycogen reserve that have been observed  
247 previously in fish (Djediat et al., 2011; Fischer et al., 2000; Fischer and Dietrich, 2000;  
248 Marie et al., 2012; Mezhoud et al., 2008) and mice (Guzman and Solter, 2002;  
249 Yoshida et al., 2001, 1998) acutely administered with MCs or MC-containing  
250 cyanobacteria extracts. In fact, the observed liver damage in the present study is also  
251 similar to some of those described in the fish after chronic intoxication with MCs  
252 (Acuña et al., 2012; Qiao et al., 2016; Trinchet et al., 2011). Trinchet and her  
253 colleagues observed an increase in rough endoplasmic reticulum in hepatocytes of  
254 medaka fish chronically exposed to MC-LR ( $5 \mu\text{g.L}^{-1}$ , 30 d), which is also found in  
255 the male toxin-treated medaka in the present study. This could be associated with the

256 induction of detoxification process. Another chronic in-house study reported a  
257 noticeable hepatic glycogen store depletion in medaka fish upon exposure to MC-LR  
258 ( $5 \mu\text{g}\cdot\text{L}^{-1}$ , 28 d) (Qiao et al., 2016), which is consistent with the acute intoxication  
259 effect of MC-LR observed here, and the increased energy needs for the MC  
260 detoxification process might be the cause.

261 Severe liver damages are often accompanied by remarkable accumulation of MCs  
262 in the liver. The present study shows an intense distribution of MC-LR in the lytic  
263 hepatocyte of the toxin-treated medaka fish through the immunohistochemistry. MCs  
264 have been reported to mostly localize in the cytoplasm of hepatocytes where they  
265 disturb a sequence of phosphorylation/dephosphorylation-dependent biochemical  
266 reactions, resulting in the disruption of multiple cellular processes, and consequently  
267 causing the deformation of hepatocytes, apoptosis and lysis (Campos and  
268 Vasconcelos, 2010). Furthermore, a high concentration of MC-LR is also observed in  
269 the hepatic nucleus here, which is consistent with the result provided in a few  
270 previous acute studies (Fischer et al., 2000; Guzman and Solter, 2002; Yoshida et al.,  
271 1998). Protein phosphatases PP1 and PP2A, one of the main molecular “target” of  
272 MCs, localize in both nucleus and cytoplasm (Shenolikar, 1994). Therefore, the  
273 observed nuclear accumulation of MC-LR could be the consequence of the MC  
274 specific antibodies binding to the MC-LR-PP1/PP2A adducts localized in the nucleus.

275 In the present study, MC-LR is also observed to be present in the gonad of  
276 MC-treated fish. For females, MC-LR is localized in the connective tissue of ovary, as  
277 well as in some maturing oocytes. The presence of MC in the connective tissue of fish  
278 ovary has been reported previously in common bream collected from  
279 MC-contaminated lakes (Trinchet et al., 2013). It seems that MCs are transported  
280 through the bloodstream into gonads, in which they can firstly accumulate in the  
281 connective tissue, and then transported into various gonadal somatic cells, even  
282 reproductive cells. Our result indeed exhibits an apparent distribution of MC-LR in  
283 the oocyte of vertebrates with *in vivo* condition for the first time, and the toxin is clearly  
284 localized in the yolk and the cytoplasm of the oocyte, being particularly highly

285 intensive in the chorion. Through the immunochemistry, MC was once reported to be  
286 present in the oocyte of snail upon exposure to MC-LR for 5 weeks (Lance et al.,  
287 2010). But it is unclear how MC-LR enters into oocytes since the oocyte plasma  
288 membrane seems to lack the OATPs possessing MC-transport capability. It can be  
289 assumed that MCs may be transported into oocytes as protein-bound forms along with  
290 protein import during oogenesis, since the exchange of a big amount of protein and  
291 other materials are occurring prior to complete chorion maturation, or even simply  
292 through the passive diffusion of a small quantity.

293 For MC-treated male fish, immunogold electron microscopy reveals an intense  
294 distribution of MC-LR in the connective tissue of the testis in some certain area, as  
295 well as in some degenerated spermatocyte-like structure. It is uncertain whether the  
296 observed degenerated structure is caused by the toxic effect of MC-LR, or is  
297 associated with the natural apoptotic loss, since a certain level of apoptosis or  
298 degeneration in germ cells is normal in fish testis (Schulz et al., 2010). The observed  
299 high accumulation of MCs in a certain area of connective tissue still implies a  
300 potential germ cell damage induced by MC exposure. The connective tissue of the  
301 testis consists of massive fibers and various types of gonadal somatic cells, such as  
302 Leydig cells and Sertoli cells. They are important functional cells in the testis, being  
303 responsible for synthesizing and secreting androgens that are essential for the  
304 development and maturation of germ cells or serving as channels for the transport of  
305 nutrients into the growing germ cells (Dietrich and Krieger, 2009). Therefore, the  
306 high accumulation of MC-LR in the connective tissue and its subsequent toxic effect  
307 on gonadal somatic cells may indirectly disturb normal spermatogenesis process,  
308 affecting the normal reproductive process. In the present study, we do not observe any  
309 histopathological modification in the spermatocyte of MC-treated fish, which seems  
310 to be due to the short exposure time (1h). In a previous in-house study, MC-LR has  
311 been reported to result in the disturbance of spermatogenesis in medaka fish following  
312 a chronic exposure (Trinchet et al., 2011). Considerable testicular injury and  
313 spermatocyte abnormality have been found in several species of vertebrate model

314 animals, such as mouse, rat and fish, upon exposure to MCs acutely or chronically (Li  
315 et al., 2008; Su et al., 2016; X. Wang et al., 2013; Zhao et al., 2012; Zhou et al., 2013).  
316 However, to date, according to *in vivo* studies using these vertebrate models, no  
317 evidence regarding the incorporation of MCs into spermatocytes has been reported yet.  
318 Only one study showed a clear distribution of MC-LR on the tubal wall of seminiferous  
319 tubules of the MC-treated rats through the immunofluorescence method (injection  
320 with 300  $\mu\text{g.kg}^{-1}$  bw of MC-L for 6 d) (L. Wang et al., 2013). In the present study,  
321 MC-LR is not found in any clear spermatocytes of the toxin-treated fish through the  
322 immunogold labeling technique, which is consistent with the common knowledge of  
323 the organ distribution of the MC-transporting OATPs. The identified OATPs that  
324 possess strong MC-transport capabilities are highly abundant in the liver, but hardly  
325 known to be present in the cell membrane of reproductive cells. However, one *in vitro*  
326 study reported that MC-LR was able to immigrate into isolated rat spermatogonia  
327 (Zhou et al., 2012). Furthermore, in this study, at least 5 OATPs were detected at the  
328 mRNA level in spermatogonia and their expression level was affected by MC-LR,  
329 implying that these OATPs may involve in MC-transport into the reproductive cells.  
330 Therefore, it is noteworthy that some unidentified OATPs which possess  
331 MC-transport capabilities might be expressed in the reproductive cells at a relatively  
332 low level. But the information regarding the unidentified MC-transporting OATPs  
333 and their expression level in reproductive cells still remains very limited.

334 The present acute study indeed shows a clear subcellular distribution of MC-LR in  
335 the gonad of the toxin-treated fish. However, in another in-house chronic study, MCs  
336 were not detected in the ovary or testis of medaka fish following a balneation  
337 exposure to 5  $\mu\text{g.L}^{-1}$  of MC-LR for 30 days by using the same immunolocalization  
338 techniques (Trinchet et al., 2011). There are at least two causes that may account for  
339 this discrepancy. Toxin concentration, detoxification process and exposure time are  
340 crucial for such immunolabeling results. Ten  $\mu\text{g.g}^{-1}$  bw of MC-LR used in the present  
341 study is a quite high concentration (the highest  $\text{LD}_{50}$  value of MCs by i.p. injection is  
342 about 1.5  $\mu\text{g.g}^{-1}$  bw in fish) (Malbrouck and Kestemont, 2006), and the short time of

343 exposure (1 h) largely reduced the possible toxin excretion process through liver  
344 detoxification, together leading to a sufficient quantity of toxin that could access to  
345 gonad through blood stream and be detected by the immunohistological method.  
346 Besides, it is worth to mention that the process of histological section preparation may  
347 affect the result, since a fraction of MC-LR (mainly free MC-LR) was removed  
348 during the dehydrating process of the section preparation. The immunostaining here  
349 indeed detects MC-LR-PP1/PP2A adducts mostly, due to the strong affinity of  
350 MC-LR to protein phosphatases PP1/PP2A (Yoshida et al., 2001). Dmet-Asp and  
351 D-Glu residues of MC-LR play important roles in forming the MC-LR-PP1/PP2A  
352 adducts (Campos and Vasconcelos, 2010).

353

## 354 **5. Conclusion**

355 Our histological and immunohistochemical results reveal that both liver and  
356 gonad are significantly affected by MC-LR exposure. An intense distribution of  
357 MC-LR within hepatocytes along with a severe liver damage attests to the potent  
358 hepatotoxicity of MC. The immunohistochemical results show that, besides being  
359 accumulated in the hepatocytes, MC-LR is also found in the connective tissue of the  
360 gonad, as well as in the reproductive cell (oocytes). This finding constitutes the first  
361 observation of the presence of MC in the reproductive cell in vertebrate model  
362 animals with *in vivo* condition. Both liver and gonad play important roles in the  
363 reproductive process of oviparous vertebrates. Our results of the present acute study,  
364 which provide a distinct subcellular localization of MC-LR in the liver and gonad,  
365 contributes to a better understanding of the potential reproductive toxicity of MC-LR  
366 at the histopathological level, favoring the characterization of underlying mechanisms.  
367 Meanwhile, the penetration of MCs into the reproductive cell suggests a possible  
368 transferring of MCs from adults into offspring which could cause a big issue for the  
369 population of aquatic organisms. The further investigation concerning this perspective  
370 is needed to advance our current knowledge of the protection of aquatic organism  
371 populations, as well as human beings from the widespread MCs in the freshwater

372 body.

373

### 374 **Acknowledgments**

375 This work was supported by grants from the CNRS Défi ENVIROMICS  
376 “Toxycyfish” project and from the ATM “Cycles biologiques: evolution et adaptation”  
377 of the MNHN to Dr. Benjamin Marie. Qin Qiao PhD is funded by the China  
378 Scholarship Council. We thank the Amagen platform for providing medaka fish Cab  
379 strain, the microscopy platform of ENVVA and MNHN for the histopathology and  
380 immunolocalization techniques. We also thank Marie-Claude Mercier for its  
381 administrative support.

### 382 **Author Contribution**

383 Q.Q., C.D., H.H., C.B., M.E. and B.M. conceived the experiments, Q.Q., C.D., H.H,  
384 C.D., S.L.M. and B.M. conducted the experiments, Q.Q., C.D., H.H and B.M.  
385 analyzed the results. All authors reviewed the manuscript.

386 The authors declare no competing financial interest.

387

### 388 **List of Supplementary materials:**

389 Supplementary material 1. Formaldehyde fixing solution (100 mL) provided by the  
390 platform of ENVVA

|     |                       |       |
|-----|-----------------------|-------|
| 391 | Formaldehyde (37-40%) | 20 mL |
| 392 | Glycerol              | 10 mL |
| 393 | Glacial acetic acid   | 10 mL |
| 394 | Absolute ethanol      | 30 mL |
| 395 | Distilled water       | 30 mL |

396

397 Supplementary material 2. Paraformaldehyde fixing solution (100 mL) provided by the  
398 platform of MNHN

|     |                        |        |
|-----|------------------------|--------|
| 399 | Paraformaldehyde (16%) | 25 mL  |
| 400 | Glutaraldehyde (50%)   | 0.4 mL |

401 Picric acid 0.1 mL  
402 0.1M pH 7.4 Sorensen buffer 74.5 mL

403 Supplementary Table 1. The body weight of individual fish in different treatment  
404 groups

| Group              | Fish No. | Gender | Body weight (g) |
|--------------------|----------|--------|-----------------|
| MC-LR              | 1        | Female | 0.45            |
|                    | 2        | Male   | 0.43            |
|                    | 3        | Female | 0.44            |
|                    | 4        | Female | 0.55            |
|                    | 5        | Male   | 0.60            |
|                    | 6        | Male   | 0.52            |
|                    | 7        | Female | 0.43            |
|                    | 8        | Male   | 0.64            |
|                    | 9        | Male   | 0.62            |
|                    | 10       | Female | 0.55            |
| Non-toxin control  | 11       | Male   | 0.43            |
|                    | 12       | Female | 0.55            |
|                    | 13       | Male   | 0.59            |
|                    | 14       | Female | 0.50            |
| Non-gavage control | 15       | Male   | 0.60            |
|                    | 16       | Female | 0.44            |

405

406 **Figure descriptions:**

407 Figure 1. Representative photos of histopathological observation of medaka liver  
408 under a light microscope.

409 A-D: resin sections (0.5  $\mu\text{m}$  thick) of medaka liver with toluidine blue staining.  
410 Female control (A): abundant and distinct distribution of reserve vesicles (v); Females  
411 exposed to 10  $\mu\text{g}\cdot\text{g}^{-1}$  bw of MC-LR (C): disintegration of the cord-like parenchymal  
412 organization, rounded hepatocytes containing various small bubbles (b), loss of  
413 reserve vesicles, nuclear membrane breakdown, chromatin concentration (c); Male  
414 control (B): abundant and distinct distribution of reserve vesicles (v); Males exposed  
415 to 10  $\mu\text{g}\cdot\text{g}^{-1}$  bw of MC-LR (D): disintegration of the cord-like parenchymal  
416 organization, swollen and rounded hepatocytes, nuclear chromatin concentration (c),  
417 and increase in endoplasmic reticulum (e) and loss of nuclei (n). E-H: paraffin

418 sections (4  $\mu\text{m}$  thick) of medaka liver with PAS staining. Female (E) and male (F)  
419 control: abundant and distinct distribution of glycogen-reserve vesicles (red-purple);  
420 Females (G) and males (H) exposed to  $10 \mu\text{g}\cdot\text{g}^{-1}$  bw of MC-LR: less glycogen-reserve  
421 vesicles compared with the control group.

422

423 Figure 2. Representative photos of immunolocalization of MC-LR in the liver and  
424 gonad of toxin-treated fish through light microscopy.

425 Sections of the toxin-treated female liver (A), ovary (C), and testis (E), stained with  
426 both toluidine blue and MC-LR immunolabeling (MC10E7), revealed with peroxidase  
427 specific reaction of DAB. n, nucleus; h, hematoxylin; The secondary antibody control  
428 sections of the toxin-treated female liver (B), ovary (D), and testis (F), stained with  
429 toluidine blue; Sections of non-toxin control female liver (G), ovary (H), and testis (I),  
430 stained with toluidine blue.

431

432 Figure 3. Representative photos of immunolocalization of MC-LR in the liver and  
433 gonad of toxin-treated fish through immunogold electron microscopy.

434 The liver (A), ovary (E and G) and testis (I) of control fish: no clear immunolabeling.  
435 The liver (B-D), ovary (F-H) and testis (J and K) of the fish exposed to  $10 \mu\text{g}\cdot\text{g}^{-1}$  bw  
436 of MC-LR, showing the immunolabeling of MC-LR indicated by the white arrow. For  
437 liver, immunolabelings of MC-LR are clearly observed in the lytic residual (B) and  
438 nuclear (C) of hepatocyte and the macrophage (D). For ovary, the immunolabeling is  
439 found in the connective tissue (left) and the chorion (c) of the oocyte (right), as has  
440 been shown in F, and less labelings are observed in the yolk vesicle (y) and the  
441 cytoplasm (cy) of the oocyte (H). For testis, the labeling is intensively distributed in  
442 some unidentified round structures, which appeared to be degenerated germ cells (J)  
443 and the connective tissue of some certain area (K)

444

445 **Reference**



- 446 Acuña, S., Baxa, D., Teh, S., 2012. Sublethal dietary effects of microcystin producing  
447 *Microcystis* on threadfin shad, *Dorosoma petenense*. *Toxicon* 60, 1191–1202.  
448 doi:10.1016/j.toxicon.2012.08.004
- 449 Campos, A., Vasconcelos, V., 2010. Molecular mechanisms of microcystin toxicity in  
450 animal cells. *Int. J. Mol. Sci.* 11, 268–287. doi:10.3390/ijms11010268
- 451 Chen, J., Zhang, D., Xie, P., Wang, Q., Ma, Z., 2009. Simultaneous determination of  
452 microcystin contaminations in various vertebrates (fish, turtle, duck and water  
453 bird) from a large eutrophic Chinese lake, Lake Taihu, with toxic *Microcystis*  
454 blooms. *Sci. Total Environ.* 407, 3317–3322.  
455 doi:10.1016/j.scitotenv.2009.02.005
- 456 Dietrich, D.R., Krieger, H.O., 2009. Chapter 5. Male gonad anatomy and morphology,  
457 in: *Histological Analysis of Endocrine-Disruptive Effects in Small Laboratory*  
458 *Fish*. pp. 88–114.
- 459 Djediat, C., Malécot, M., de Luze, A., Bernard, C., Puiseux-Dao, S., Edery, M., 2010.  
460 Localization of microcystin-LR in medaka fish tissues after cyanotoxin gavage.  
461 *Toxicon* 55, 531–535. doi:10.1016/j.toxicon.2009.10.005
- 462 Djediat, C., Moyenga, D., Malécot, M., Comte, K., Yéprémian, C., Bernard, C.,  
463 Puiseux-Dao, S., Edery, M., 2011. Oral toxicity of extracts of the  
464 microcystin-containing cyanobacterium *Planktothrix agardhii* to the medaka fish  
465 (*Oryzias latipes*). *Toxicon* 58, 112–122. doi:10.1016/j.toxicon.2011.05.011
- 466 Fischer, A., Hoeger, S.J., Stemmer, K., Feurstein, D.J., Knobloch, D., Nussler, A.,  
467 Dietrich, D.R., 2010. The role of organic anion transporting polypeptides

468 (OATPs/SLCOs) in the toxicity of different microcystin congeners *in vitro*: A  
469 comparison of primary human hepatocytes and OATP-transfected HEK293 cells.  
470 Toxicol. Appl. Pharmacol. 245, 9–20. doi:10.1016/j.taap.2010.02.006  
471 Fischer, W.J., Altheimer, S., Cattori, V., Meier, P.J., Dietrich, D.R., Hagenbuch, B.,  
472 2005. Organic anion transporting polypeptides expressed in liver and brain  
473 mediate uptake of microcystin. Toxicol. Appl. Pharmacol. 203, 257–263.  
474 doi:10.1016/j.taap.2004.08.012  
475 Fischer, W.J., Dietrich, D.R., 2000. Pathological and biochemical characterization of  
476 microcystin-induced hepatopancreas and kidney damage in carp (*Cyprinus*  
477 *carpio*). Toxicol. Appl. Pharmacol. 164, 73–81. doi:10.1006/taap.1999.8861  
478 Fischer, W.J., Hitzfeld, B.C., Tencalla, F., Eriksson, J.E., Mikhailov, A., Dietrich,  
479 D.R., 2000. Microcystin-LR toxicodynamics, induced pathology, and  
480 immunohistochemical localization in livers of blue-green algae exposed rainbow  
481 trout (*oncorhynchus mykiss*). Toxicol. Sci. 54, 365–73.  
482 doi:10.1093/toxsci/54.2.365  
483 Guzman, R.E., Solter, P.F., 2002. Characterization of sublethal microcystin-LR  
484 exposure in mice. Vet. Pathol. 39, 17–26. doi:10.1354/vp.39-1-17  
485 Hagenbuch, B., Stieger, B., 2013. The SLCO (former SLC21) superfamily of  
486 transporters. Mol. Aspects Med. 34, 396–412. doi:10.1016/j.mam.2012.10.009  
487 Hou, J., Li, L., Xue, T., Long, M., Su, Y., Wu, N., 2015. Hepatic positive and  
488 negative antioxidant responses in zebrafish after intraperitoneal administration of  
489 toxic microcystin-LR. Chemosphere 120, 729–736.

- 490       doi:10.1016/j.chemosphere.2014.09.079
- 491   Lance, E., Josso, C., Dietrich, D., Ernst, B., Paty, C., Senger, F., Bormans, M., Gérard,  
492       C., 2010. Histopathology and microcystin distribution in *Lymnaea stagnalis*  
493       (Gastropoda) following toxic cyanobacterial or dissolved microcystin-LR  
494       exposure 98, 211–220.
- 495   Li, Y., Sheng, J., Sha, J., Han, X., 2008. The toxic effects of microcystin-LR on the  
496       reproductive system of male rats *in vivo* and *in vitro*. *Reprod. Toxicol.* 26, 239–  
497       245. doi:10.1016/j.reprotox.2008.09.004
- 498   MacKintosh, C., Beattie, K.A., Klumpp, S., Cohen, P., Codd, G.A., 1990.  
499       Cyanobacterial microcystin-LR is a potent and specific inhibitor of protein  
500       phosphatases 1 and 2A from both mammals and higher plants. *FEBS* 264, 187–  
501       192.
- 502   Malbrouck, C., Kestemont, P., 2006. Effects of microcystins on fish. *Environ. Toxicol.*  
503       *Chem.* 25, 72–86. doi:10.1897/05-029R.1
- 504   Marie, B., Huet, H., Marie, A., Djediat, C., Puiseux-Dao, S., Catherine, A., Trinchet,  
505       I., Edery, M., 2012. Effects of a toxic cyanobacterial bloom (*Planktothrix*  
506       *agardhii*) on fish: Insights from histopathological and quantitative proteomic  
507       assessments following the oral exposure of medaka fish (*Oryzias latipes*). *Aquat.*  
508       *Toxicol.* 114–115, 39–48. doi:10.1016/j.aquatox.2012.02.008
- 509   Mattos, L.J., Valença, S.S., Azevedo, S.M.F.O., Soares, R.M., 2014. Dualistic  
510       evolution of liver damage in mice triggered by a single sublethal exposure to  
511       Microcystin-LR. *Toxicol.* 83, 43–51. doi:10.1016/j.toxicol.2014.02.015

- 512 Meier-Abt, F., Hammann-Hänni, A., Stieger, B., Ballatori, N., Boyer, J.L., 2007. The  
513 organic anion transport polypeptide 1d1 (Oatp1d1) mediates hepatocellular  
514 uptake of phalloidin and microcystin into skate liver. *Toxicol. Appl. Pharmacol.*  
515 218, 274–279. doi:10.1016/j.taap.2006.11.015
- 516 Mezhoud, K., Bauchet, A.L., Château-Joubert, S., Praseuth, D., Marie, A., François,  
517 J.C., Fontaine, J.J., Jaeg, J.P., Cravedi, J.P., Puisieux-Dao, S., Edery, M., 2008.  
518 Proteomic and phosphoproteomic analysis of cellular responses in medaka fish  
519 (*Oryzias latipes*) following oral gavage with microcystin-LR. *Toxicon* 51, 1431–  
520 1439. doi:10.1016/j.toxicon.2008.03.017
- 521 Papadimitriou, T., Kagalou, I., Stalikas, C., Pilidis, G., Leonardos, I.D., 2012.  
522 Assessment of microcystin distribution and biomagnification in tissues of aquatic  
523 food web compartments from a shallow lake and evaluation of potential risks to  
524 public health. *Ecotoxicology* 21, 1155–1166. doi:10.1007/s10646-012-0870-y
- 525 Puddick, J., Prinsep, M.R., Wood, S.A., Kaufononga, S.A.F., Cary, S.C., Hamilton,  
526 D.P., 2014. High levels of structural diversity observed in microcystins from  
527 *Microcystis* CAWBG11 and characterization of six new microcystin congeners.  
528 *Mar. Drugs* 12, 5372–5395. doi:10.3390/md12115372
- 529 Qiao, Q., Le Manach, S., Huet, H., Duvernois-Berthet, E., Chaouch, S., Duval, C.,  
530 Sotton, B., Ponger, L., Marie, A., Math??ron, L., Lennon, S., Bolbach, G.,  
531 Djediat, C., Bernard, C., Edery, M., Marie, B., 2016. An integrated omic analysis  
532 of hepatic alteration in medaka fish chronically exposed to cyanotoxins with  
533 possible mechanisms of reproductive toxicity. *Environ. Pollut.* 219, 119–131.

- 534       doi:10.1016/j.envpol.2016.10.029
- 535   Schulz, R.W., de Fran??a, L.R., Lareyre, J.J., LeGac, F., Chiarini-Garcia, H., Nobrega,  
536       R.H., Miura, T., 2010. Spermatogenesis in fish. *Gen. Comp. Endocrinol.* 165,  
537       390–411. doi:10.1016/j.ygcen.2009.02.013
- 538   Shenolikar, S., 1994. Protein serine/threonine phosphatases - new avenues for cell  
539       regulation. *Annu. Biol.* 10, 55–86.
- 540   Spoof, L., Catherine, A., 2017. Appendix 3: Tables of microcystins and nodularins, in:  
541       *Handbook of Cyanobacterial Monitoring and Cyanotoxin Analysis.* pp. 526–537.  
542       doi:10.1002/9781119068761.app3
- 543   Steiner, K., Hagenbuch, B., Dietrich, D.R., 2014. Molecular cloning and functional  
544       characterization of a rainbow trout liver Oatp. *Toxicol. Appl. Pharmacol.* 280,  
545       534–542. doi:10.1016/j.taap.2014.08.031
- 546   Steiner, K., Zimmermann, L., Hagenbuch, B., Dietrich, D., 2016. Zebrafish  
547       Oatp-mediated transport of microcystin congeners. *Arch. Toxicol.* 90, 1129–  
548       1139. doi:10.1007/s00204-015-1544-3
- 549   Su, Y., Li, L., Hou, J., Wu, N., Lin, W., Li, G., 2016. Life-cycle exposure to  
550       microcystin-LR interferes with the reproductive endocrine system of male  
551       zebrafish. *Aquat. Toxicol.* 175, 205–212. doi:10.1016/j.aquatox.2016.03.018
- 552   Trinchet, I., Cadel-Six, S., Djediat, C., Marie, B., Bernard, C., Puiseux-Dao, S., Krys,  
553       S., Edery, M., 2013. Toxicity of harmful cyanobacterial blooms to bream and  
554       roach. *Toxicon* 71, 121–127. doi:10.1016/j.toxicon.2013.05.019
- 555   Trinchet, I., Djediat, C., Huet, H., Dao, S.P., Edery, M., 2011. Pathological

556 modifications following sub-chronic exposure of medaka fish (*Oryzias latipes*)  
557 to microcystin-LR. *Reprod. Toxicol.* 32, 329–340.  
558 doi:10.1016/j.reprotox.2011.07.006

559 Wang, L., Wang, X., Geng, Z., Zhou, Y., Chen, Y., Wu, J., Han, X., 2013.  
560 Distribution of microcystin-LR to testis of male Sprague-Dawley rats.  
561 *Ecotoxicology* 22, 1555–1563. doi:10.1007/s10646-013-1141-2

562 Wang, X., Chen, Y., Zuo, X., Ding, N., Zeng, H., Zou, X., Han, X., 2013. Microcystin  
563 (-LR) induced testicular cell apoptosis via up-regulating apoptosis-related genes  
564 in vivo. *Food Chem. Toxicol.* 60, 309–317. doi:10.1016/j.fct.2013.07.039

565 Yoshida, T., Makita, Y., Tsutsumi, T., Nagata, S., Tashiro, F., Yoshida, F., Sekijima,  
566 M., Tamura, S., Harada, T., Maita, K., Ueno, Y., 1998. Immunohistochemical  
567 localization of microcystin-LR in the liver of mice: A study on the pathogenesis  
568 of microcystin-LR-induced hepatotoxicity. *Toxicol. Pathol.* 26, 411–418.  
569 doi:10.1177/019262339802600316

570 Yoshida, T., Tsutsumi, T., Nagata, S., Yoshida, F., Maita, K., Harada, T., Ueno, Y.,  
571 2001. Quantitative analysis of intralobular distribution of microcystin-LR in the  
572 mouse liver. *J. Toxicol. Pathol.* 14, 205–212. doi:10.1293/tox.14.205

573 Zeck, A., Eikenberg, A., Weller, M.G., Niessner, R., 2001. Highly sensitive  
574 immunoassay based on a monoclonal antibody specific for [ 4-arginine ]  
575 microcystins. *Anal. Chim. Acta* 441, 1–13.

576 Zhang, H., Cai, C., Fang, W., Wang, J., Zhang, Y., Liu, J., Jia, X., 2013. Oxidative  
577 damage and apoptosis induced by microcystin-LR in the liver of *Rana*

- 578 *nigromaculata* in vivo. *Aquat. Toxicol.* 140–141, 11–18.
- 579 doi:10.1016/j.aquatox.2013.05.009
- 580 Zhao, S., Xie, P., Li, G., Jun, C., Cai, Y., Xiong, Q., Zhao, Y., 2012. The proteomic  
581 study on cellular responses of the testes of zebrafish (*Danio rerio*) exposed to  
582 microcystin-RR. *Proteomics* 12, 300–312. doi:10.1002/pmic.201100214
- 583 Zhou, M., Tu, W.W., Xu, J., 2015. Mechanisms of microcystin-LR-induced  
584 cytoskeletal disruption in animal cells. *Toxicol.* 101, 92–100.  
585 doi:10.1016/j.toxicol.2015.05.005
- 586 Zhou, Y., Chen, Y., Yuan, M., Xiang, Z., Han, X., 2013. In vivo study on the effects  
587 of microcystin-LR on the apoptosis, proliferation and differentiation of rat  
588 testicular spermatogenic cells of male rats injected i.p. with toxins. *J. Toxicol.*  
589 *Sci.* 38, 661–70. doi:10.2131/jts.38.661
- 590 Zhou, Y., Yuan, J., Wu, J., Han, X., 2012. The toxic effects of microcystin-LR on rat  
591 spermatogonia in vitro. *Toxicol. Lett.* 212, 48–56.  
592 doi:10.1016/j.toxlet.2012.05.001
- 593

Figure 1

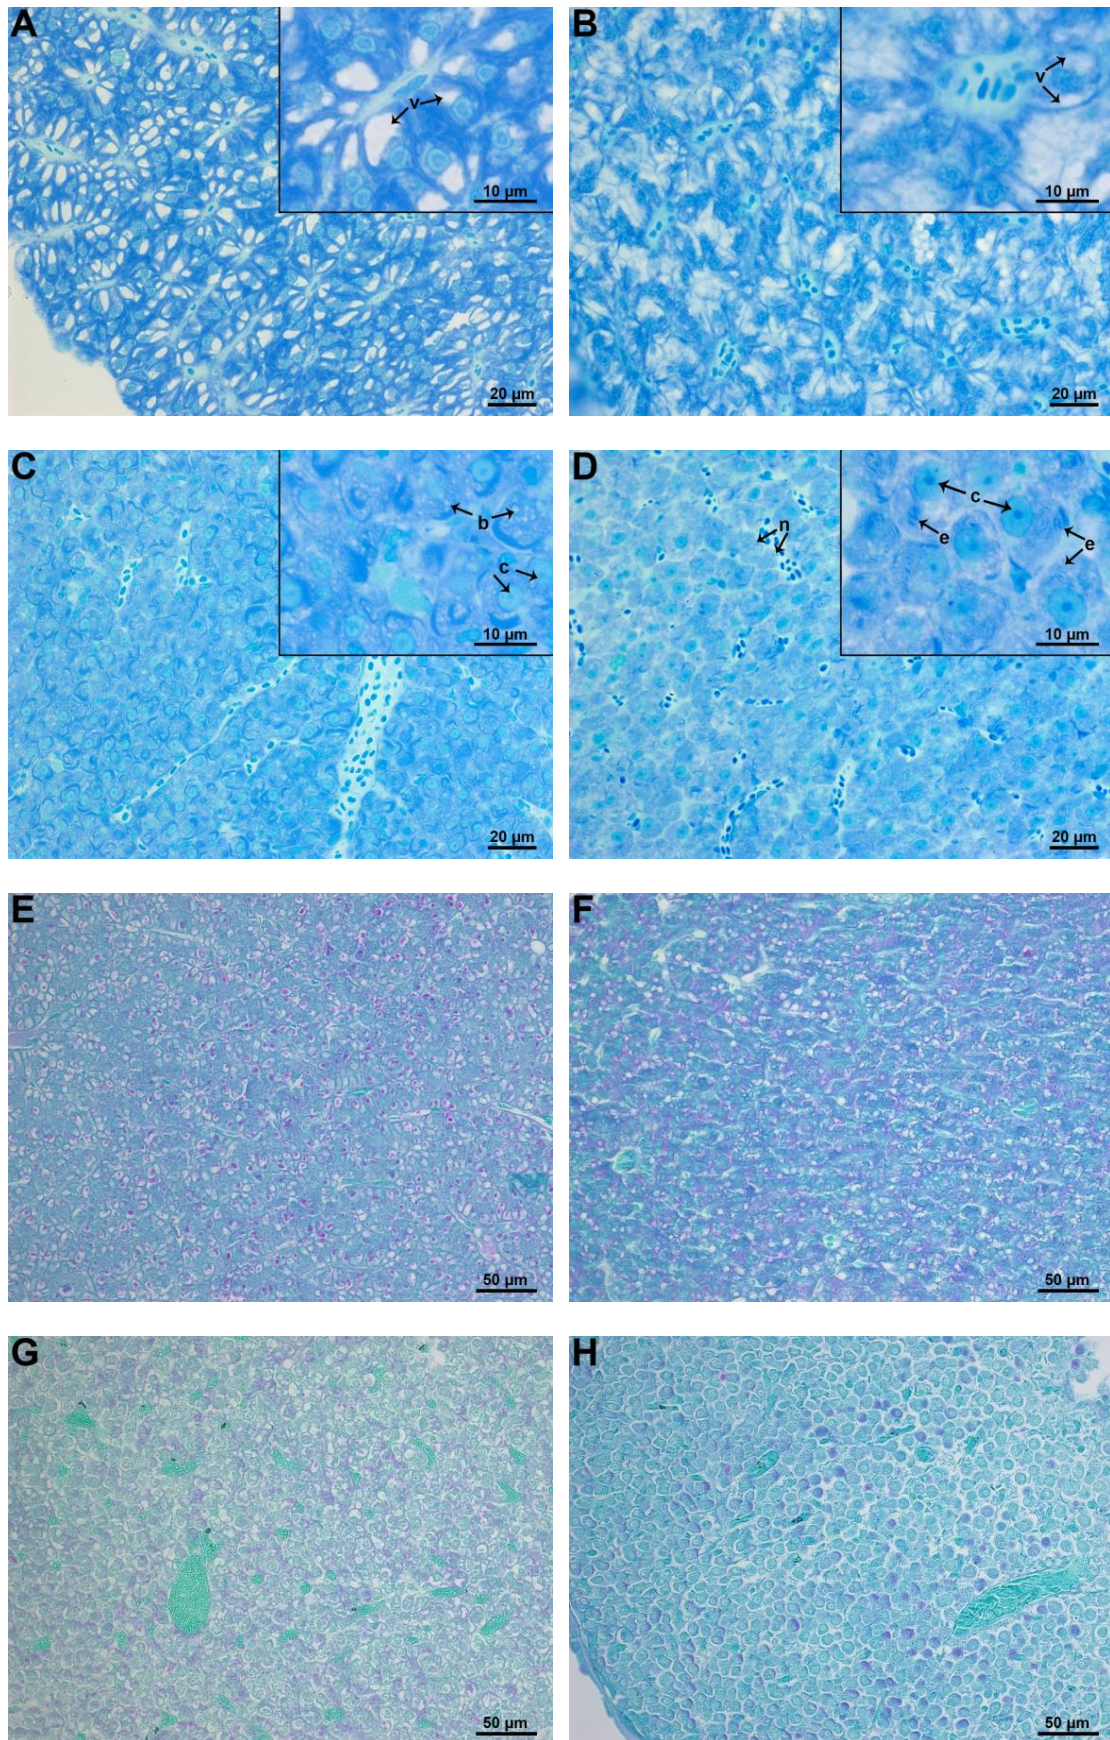



Figure 2

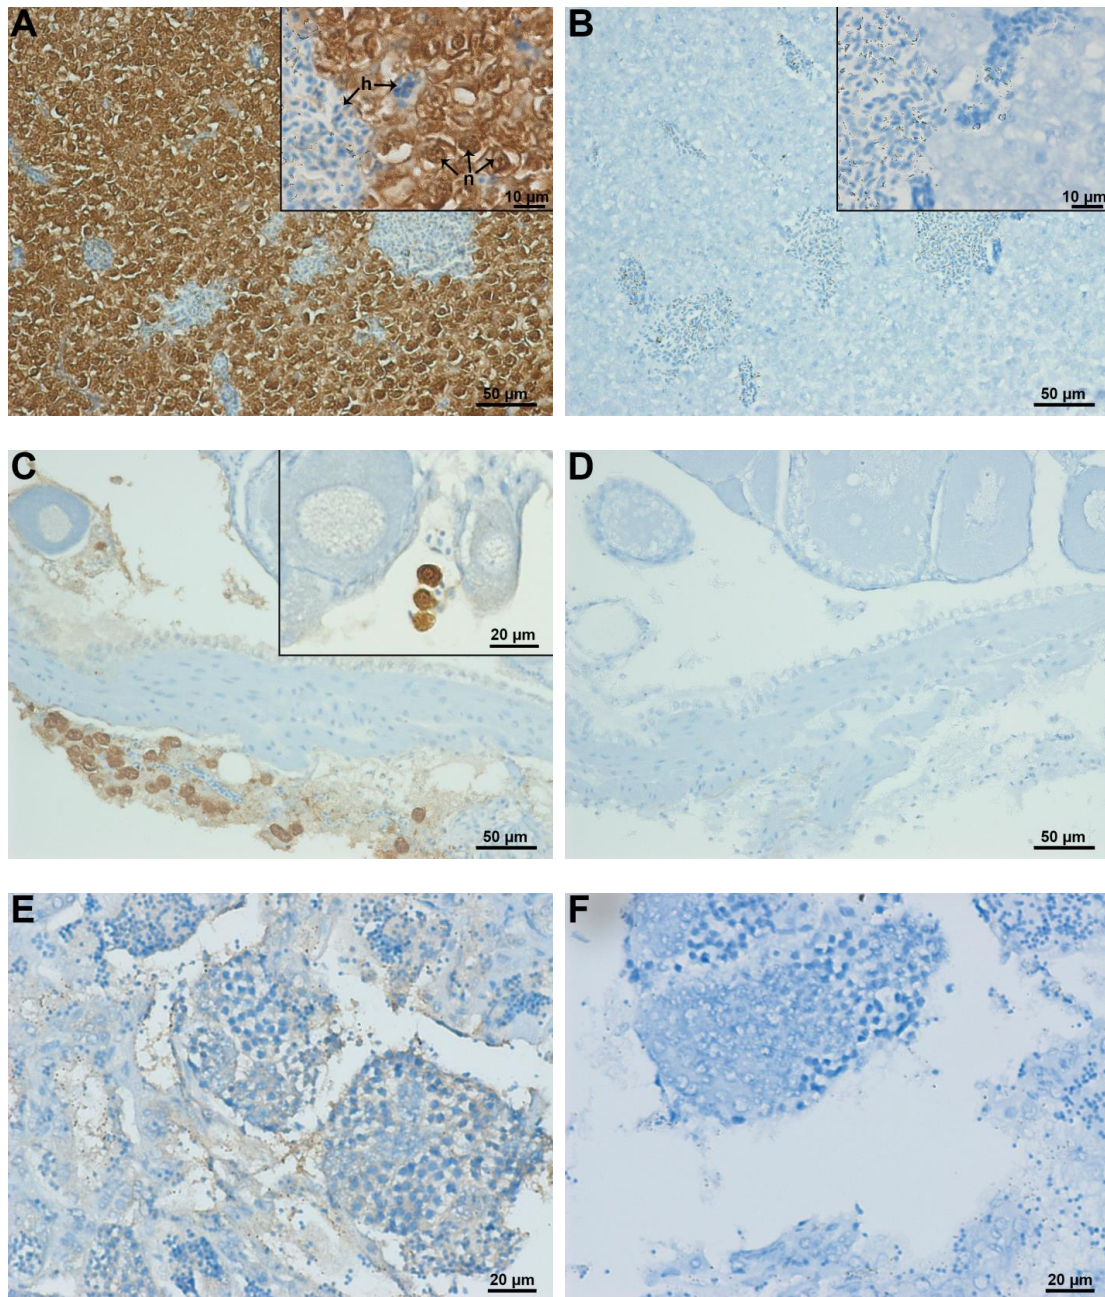

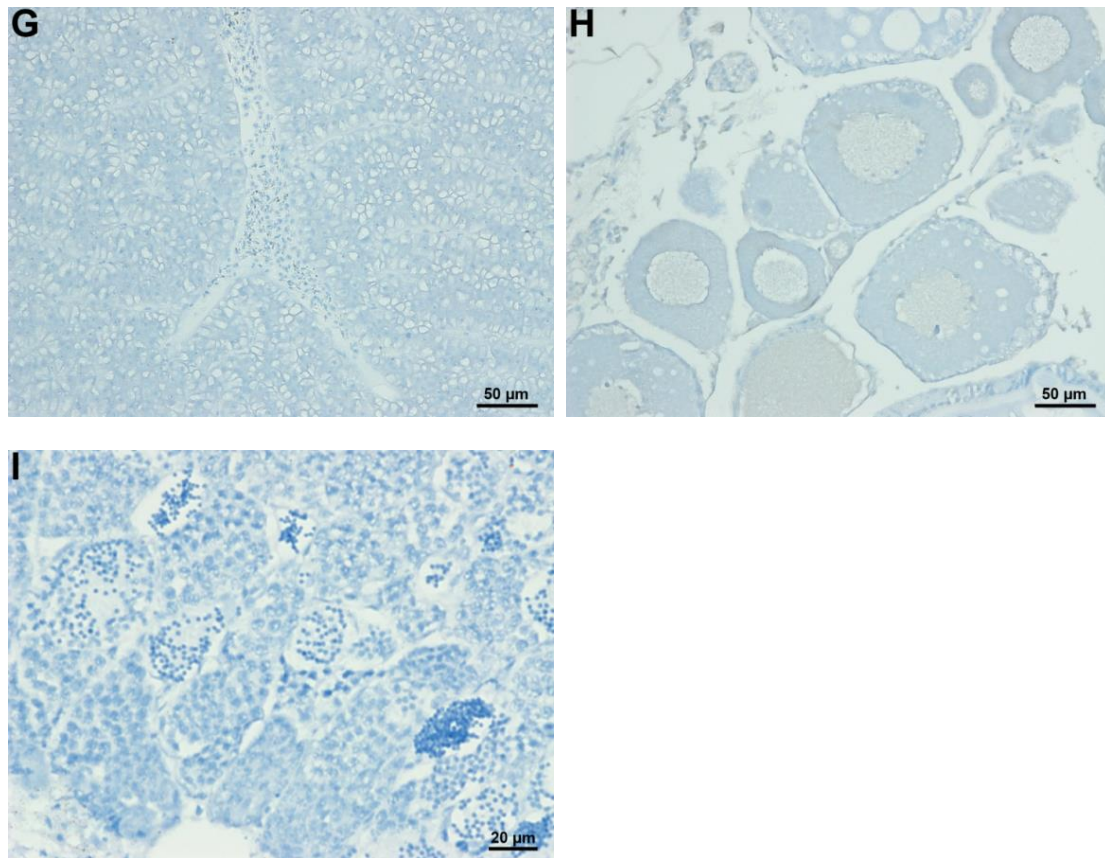

Figure 3

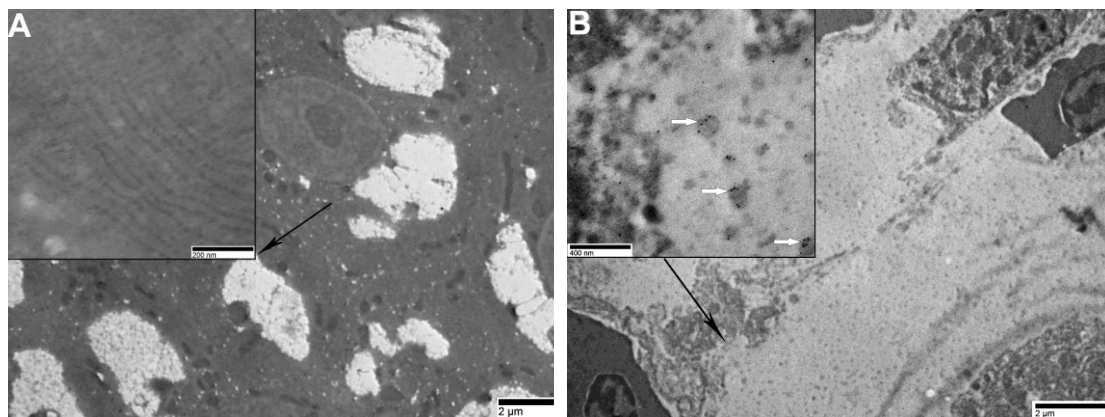

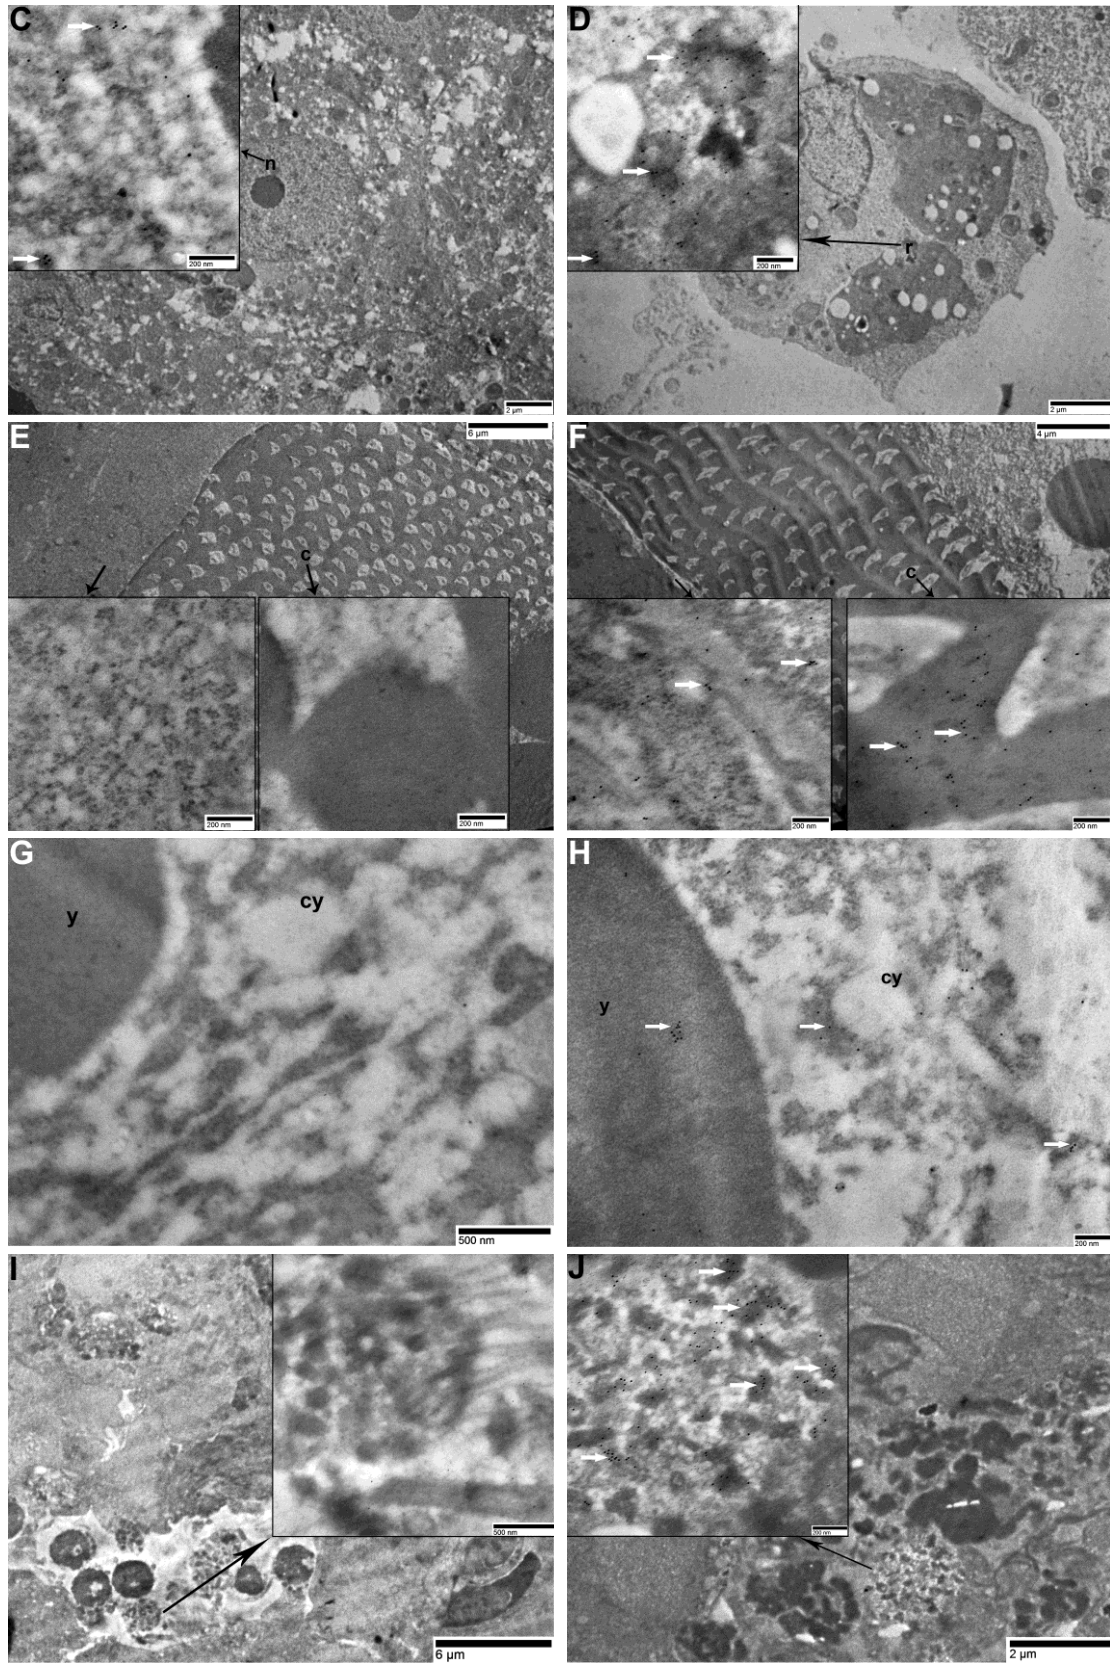

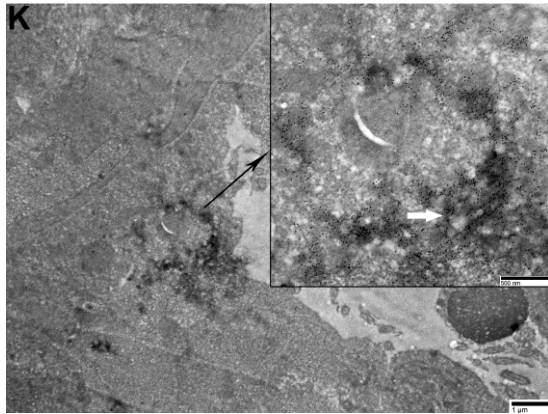

Source: https://www.biorxiv.org/content/10.1101/416255v1.full.pdf
